# Supplementary material for: Clinical Impact of Prospective Whole Genome Sequencing in Sarcoma Patients
Source: Cancers (Basel). 2022 Jan 16;14(2):436. doi: 10.3390/cancers14020436 (PMC8773512; doi:10.3390/cancers14020436)
Supplement: Supplementary file 1 [file cancers-14-00436-s001.zip]

Archive with 5 entries (5 files):
- Supplementary data - Detailed genomic information per sample.xlsx
- Supplementary Figure S1 - Detailed description pathology revision cases.pdf
- Supplementary Figure S2 - Schematic overview of a large KIT exon 11 deletion in a patient with a gastrointestinal stromal tumor..pdf
- Supplementary Figure S3 - Timeline plots of patients with diagnostic revisions with direct therapy implications.pdf
- Supplementary tables.xlsx
