# Supplementary material for: Clinical Impact of Prospective Whole Genome Sequencing in Sarcoma Patients
Source: Cancers (Basel). 2022 Jan 16;14(2):436. doi: 10.3390/cancers14020436 (PMC8773512; doi:10.3390/cancers14020436)
Supplement: Supplementary file 1 [file cancers-14-00436-s001.zip › Supplementary data - Detailed genomic information per sample.xlsx]

## Sheet: SNVs, MNVs, indels
sampleId	chromosome	position	gene	ref	alt	canonicalEffect	canonicalHgvsCodingImpact	canonicalHgvsProteinImpact	adjustedVaf
1	7	124503601	POT1	G	A	missense_variant	c.349C>T	p.Arg117Cys	0.6704
2	7	124503463	POT1	C	A	missense_variant	c.487G>T	p.Asp163Tyr	1.0
2	9	101900288	TGFBR1	C	T	missense_variant	c.722C>T	p.Ser241Leu	0.3826
5	1	51439653	CDKN2C	TCATTCATGATGCGGCCAGAGC	T	inframe_deletion	c.219_239delCATTCATGATGCGGCCAGAGC	p.Ile74_Ala80del	0.9841
7	9	21971145	CDKN2A	G	T	missense_variant	c.213C>A	p.Asn71Lys	0.9727
7	17	7577575	TP53	A	G	missense_variant	c.706T>C	p.Tyr236His	0.9129
10	6	157099981	ARID1B	GGGCGGCGGC	G	inframe_deletion	c.919_927delGGCGGCGGC	p.Gly307_Gly309del	0.8012
11	3	52649403	PBRM1	C	T	missense_variant	c.1888G>A	p.Asp630Asn	0.137
12	2	25464430	DNMT3A	C	T	splice_donor_variant&intron_variant	c.2082+1G>A		0.1375
12	22	30054229	NF2	C	A	stop_gained	c.651C>A	p.Tyr217*	0.6437
18	X	76939961	ATRX	ATTGG	A	frameshift_variant	c.783_786delCCAA	p.Gln262fs	1.0
18	12	49431305	KMT2D	T	TTGCTGC	inframe_insertion	c.9828_9833dupGCAGCA	p.Gln3277_Gln3278dup	0.3115
21	6	26056066	HIST1H1C	GGCCTTGGGCTTCACAGCCTTAGCAGCACTTTTGGCA	G	inframe_deletion	c.555_590delTGCCAAAAGTGCTGCTAAGGCTGTGAAGCCCAAGGC	p.Ala186_Ala197del	0.354
22	17	7577599	TP53	C	CA	frameshift_variant	c.681dupT	p.Asp228fs	0.9793
23	11	108141790	ATM	G	T	splice_acceptor_variant&intron_variant	c.2839-1G>T		1.0
23	17	15952243	NCOR1	GAGATGGGCTCGTAGGGCTCCGAA	G	frameshift_variant	c.6429_6451delTTCGGAGCCCTACGAGCCCATCT	p.Ser2144fs	0.9075
24	6	157100430	ARID1B	AGGC	A	inframe_deletion	c.1368_1370delGGC	p.Ala457del	0.0517
24	9	139399408	NOTCH1	G	GCAC	inframe_insertion	c.4732_4734dupGTG	p.Val1578dup	0.4779
24	10	89720778	PTEN	A	G	missense_variant	c.929A>G	p.Asp310Gly	0.9858
24	13	48947596	RB1	C	T	stop_gained	c.1183C>T	p.Gln395*	1.0
24	17	7578206	TP53	T	C	missense_variant	c.643A>G	p.Ser215Gly	0.9938
25	15	74290812	PML	GACCAGGTGAGT	G	frameshift_variant&splice_donor_variant&splice_region_variant&intron_variant	c.598_602+6delACCAGGTGAGT	p.Thr200fs	0.1371
25	17	7577114	TP53	C	CGTA	inframe_insertion	c.823_824insTAC	p.Cys275delinsLeuArg	0.9927
27	X	76874405	ATRX	T	TG	frameshift_variant	c.5316dupC	p.Ile1773fs	0.6181
27	9	101909952	TGFBR1	C	A	stop_gained	c.1272C>A	p.Tyr424*	0.4968
28	17	7573988	TP53	C	G	missense_variant	c.1039G>C	p.Ala347Pro	0.9621
29	5	86682653	RASA1	T	C	missense_variant	c.2858T>C	p.Met953Thr	0.9844
29	17	7579393	TP53	AG	A	frameshift_variant	c.293delC	p.Pro98fs	0.9953
30	7	124481192	POT1	G	GAA	frameshift_variant	c.1202_1203dupTT	p.Gln402fs	0.0858
32	6	157100430	ARID1B	AGGC	A	inframe_deletion	c.1368_1370delGGC	p.Ala457del	0.0456
32	X	76944383	ATRX	ACAAGCAGTGCAGCTCACAATCCCATGAAGCCCATCTTCTAGGAG	A	frameshift_variant&splice_acceptor_variant&splice_region_variant&intron_variant	c.485-7_521delCTCCTAGAAGATGGGCTTCATGGGATTGTGAGCTGCACTGCTTG	p.Glu162fs	0.1704
33	17	38556625	TOP2A	C	T	missense_variant	c.2836G>A	p.Gly946Ser	0.5033
34	19	47424848	ARHGAP35	GGCAGGATCACCGCTCTGCAACTCAAACCT	G	frameshift_variant	c.2917_2945delGCAGGATCACCGCTCTGCAACTCAAACCT	p.Ser975fs	0.9914
34	6	157100430	ARID1B	AGGC	A	inframe_deletion	c.1368_1370delGGC	p.Ala457del	0.0574
34	17	7577022	TP53	G	A	stop_gained	c.916C>T	p.Arg306*	1.0
35	17	7577509	TP53	C	A	stop_gained	c.772G>T	p.Glu258*	0.9398
36	4	55573430	KIT	G	C	missense_variant	c.1092G>C	p.Lys364Asn	0.0537
36	17	7577499	TP53	CTGGAG	C	frameshift_variant&splice_region_variant	c.777_781delCTCCA	p.Asp259fs	0.9912
37	13	48955459	RB1	CTTTGATTTTTACAAAGTGATCGAAAGTTTTATCAAAGCA	C	inframe_deletion	c.1576_1614delTTTGATTTTTACAAAGTGATCGAAAGTTTTATCAAAGCA	p.Phe526_Ala538del	0.7108
38	17	7578525	TP53	G	T	stop_gained	c.405C>A	p.Cys135*	0.617
40	17	7576817	TP53	ACTTTCCACTTGATAAGAGGTCCCAAGACTTAGTAC	A	splice_donor_variant&splice_donor_variant&splice_region_variant&intron_variant	c.993+1_993+35delGTACTAAGTCTTGGGACCTCTTATCAAGTGGAAAG		0.8314
41	6	157100430	ARID1B	AGGC	A	inframe_deletion	c.1368_1370delGGC	p.Ala457del	0.0718
41	X	76814252	ATRX	CG	C	frameshift_variant	c.6391delC	p.Arg2131fs	0.6192
41	X	76814255	ATRX	T	G	missense_variant	c.6389A>C	p.Asn2130Thr	0.606
42	11	108163374	ATM	C	T	missense_variant	c.4465C>T	p.Arg1489Cys	0.0849
42	15	41962111	MGA	C	G	stop_gained	c.1019C>G	p.Ser340*	1.0
43	17	37618877	CDK12	A	AGGAAAGAACG	frameshift_variant	c.553_554insGGAAAGAACG	p.Leu190fs	0.4801
43	10	89720711	PTEN	GA	G	frameshift_variant	c.863delA	p.Val290fs	1.0
44	11	17741694	MYOD1	T	G	missense_variant	c.365T>G	p.Leu122Arg	0.8158
46	17	7578475	TP53	G	A	missense_variant	c.455C>T	p.Pro152Leu	0.8564
47	22	24167459	SMARCB1	G	T	missense_variant	c.843G>T	p.Trp281Cys	1.0
47	6	138200479	TNFAIP3	GAAAAC	G	frameshift_variant	c.1898_1902delAAAAC	p.Asn634fs	0.8852
48	12	21358813	SLCO1B1	T	A	missense_variant	c.1343T>A	p.Val448Glu	1.0
49	17	7576878	TP53	AGTGGTTTCTTCTTTGGCTGGGGAGAGGAGCTG	A	frameshift_variant	c.936_967delCAGCTCCTCTCCCCAGCCAAAGAAGAAACCAC	p.Ser313fs	0.9514
50	17	29587442	NF1	CTT	C	frameshift_variant	c.4487_4488delTT	p.Ser1497fs	0.9567
50	9	139390944	NOTCH1	TGTG	T	inframe_deletion	c.7244_7246delCAC	p.Pro2415del	0.044
50	9	87317283	NTRK2	TAAA	T	inframe_deletion	c.309_311delAAA	p.Lys104del	1.0
51	4	55593581	KIT	GAAACCCATGTATGAAGTACAGTGGAAG	G	splice_region_variant&inframe_deletion	c.1648_1674delAAACCCATGTATGAAGTACAGTGGAAG	p.Lys550_Lys558del	0.5558
51	4	55594258	KIT	T	C	missense_variant	c.1961T>C	p.Val654Ala	0.5016
52	10	8100362	GATA3	G	A	stop_gained	c.336G>A	p.Trp112*	0.0783
52	5	251543	SDHA	G	A	missense_variant	c.1754G>A	p.Arg585Gln	0.434
53	4	55593586	KIT	CCATGTATGAAGTACAGTG	C	inframe_deletion	c.1653_1670delCATGTATGAAGTACAGTG	p.Met552_Trp557del	0.4531
53	5	56174859	MAP3K1	G	A	missense_variant	c.2018G>A	p.Arg673Lys	0.4781
53	13	48953752	RB1	T	A	stop_gained	c.1355T>A	p.Leu452*	0.9856
54	22	41527627	EP300	G	T	missense_variant	c.1518G>T	p.Met506Ile	1.0
54	4	55593609	KIT	GTTGTTGAGGAGATAAATGGAAACAATTATGTTTACATAGACCCAACACAAC	G	inframe_deletion	c.1676_1726delTTGTTGAGGAGATAAATGGAAACAATTATGTTTACATAGACCCAACACAAC	p.Val560_Leu576del	0.489
55	4	55593599	KIT	ACAGTGGAAGGTTGTTGAGGAGATAAATGGAAACAATTATGTTTACATAGAC	A	inframe_deletion	c.1666_1716delCAGTGGAAGGTTGTTGAGGAGATAAATGGAAACAATTATGTTTACATAGAC	p.Gln556_Asp572del	0.3389
55	4	55599338	KIT	A	T	missense_variant	c.2464A>T	p.Asn822Tyr	0.4746
58	16	67644709	CTCF	TGTTCTCCCTTAATAAAGGCAGGGGA	T	splice_acceptor_variant&splice_region_variant&UTR_variant&intron_variant	c.-9-17_-2delGTTCTCCCTTAATAAAGGCAGGGGA		0.737
58	16	67644737	CTCF	T	C	start_lost	c.2T>C	p.Met1?	0.6651
59	1	16260811	SPEN	CCTG	C	inframe_deletion	c.8077_8079delCTG	p.Leu2693del	0.3085
62	17	7578205	TP53	C	T	missense_variant	c.644G>A	p.Ser215Asn	1.0
63	1	149785196	HIST2H3D	C	G	missense_variant	c.41G>C	p.Gly14Ala	0.3694
64	17	7577082	TP53	C	T	missense_variant	c.856G>A	p.Glu286Lys	0.8702
65	17	7576910	TP53	GGT	G	frameshift_variant	c.934_935delAC	p.Thr312fs	1.0
68	9	21974750	CDKN2A	TCTACCCGACCC	T	frameshift_variant	c.66_76delGGGTCGGGTAG	p.Arg24fs	0.8639
68	17	7577106	TP53	G	A	missense_variant	c.832C>T	p.Pro278Ser	0.8943
69	X	76829713	ATRX	A	T	splice_donor_variant&intron_variant	c.6326+2T>A		0.9823
69	22	29105986	CHEK2	ATACT	A	splice_donor_variant&splice_region_variant&intron_variant	c.975+4_975+7delAGTA		0.999
69	17	7577498	TP53	C	A	splice_donor_variant&intron_variant	c.782+1G>T		0.9788
70	13	48881469	RB1	TA	T	frameshift_variant	c.192delA	p.Lys65fs	0.8787
70	17	7577477	TP53	AGGGTGGCAAGTGGCTCCTGACCTG	A	splice_donor_variant&splice_donor_variant&splice_region_variant&inframe_deletion&intron_variant	c.780_782+21delCAGGTCAGGAGCCACTTGCCACCC	p.Ser261del	1.0
72	X	76937696	ATRX	T	A	stop_gained	c.3052A>T	p.Lys1018*	0.6592
72	X	76938527	ATRX	CC	AA	missense_variant	c.2220_2221delGGinsTT	p.GluVal740AspLeu	0.068
74	3	47165207	SETD2	AACCTGTTTTTTT	A	inframe_deletion	c.907_918delAAAAAAACAGGT	p.Lys303_Gly306del	0.2598
75	X	76814187	ATRX	G	A	missense_variant	c.6457C>T	p.Arg2153Cys	0.8546
76	5	86629102	RASA1	C	T	missense_variant	c.847C>T	p.Arg283Cys	0.1723
77	4	126329646	FAT4	A	C	missense_variant	c.5617A>C	p.Asn1873His	0.9867
77	11	64573805	MEN1	TTCATCCCGATAG	T	stop_gained&inframe_deletion	c.951_962delCTATCGGGATGA	p.Tyr317_Glu321delinsTer	0.9036
77	13	48953730	RB1	C	T	stop_gained&splice_region_variant	c.1333C>T	p.Arg445*	0.9447
79	X	39932109	BCOR	ACT	A	frameshift_variant	c.2488_2489delAG	p.Ser830fs	0.9792
79	5	1295228	TERT	G	A	upstream_gene_variant	c.-124C>T		0.5405
79	17	7578395	TP53	G	A	missense_variant	c.535C>T	p.His179Tyr	0.9807
79	9	135779811	TSC1	C	T	stop_gained	c.2028G>A	p.Trp676*	0.9491
81	9	21971016	CDKN2A	GG	AA	missense_variant	c.341_342delCCinsTT	p.Pro114Leu	0.9863
81	3	178919111	PIK3CA	C	T	missense_variant	c.596C>T	p.Ser199Phe	0.3236
81	3	178936082	PIK3CA	G	A	missense_variant	c.1624G>A	p.Glu542Lys	0.4355
81	5	1295228	TERT	G	A	upstream_gene_variant	c.-124C>T		0.2411
81	17	7578412	TP53	A	T	missense_variant	c.518T>A	p.Val173Glu	1.0
82	7	140453136	BRAF	A	T	missense_variant	c.1799T>A	p.Val600Glu	0.6888
82	9	127912080	PPP6C	G	A	missense_variant	c.901C>T	p.Arg301Cys	1.0
82	13	48919241	RB1	A	T	stop_gained	c.406A>T	p.Lys136*	0.254
82	13	48954326	RB1	CAT	C	frameshift_variant	c.1448_1449delAT	p.Met484fs	0.7264
82	5	1295242	TERT	GG	AA	upstream_gene_variant	c.-139_-138delCCinsTT		0.6095
83	3	52643768	PBRM1	G	A	stop_gained	c.2128C>T	p.Arg710*	0.5114
83	3	52692235	PBRM1	G	GA	frameshift_variant	c.624dupT	p.Gln209fs	0.5441
83	2	198266834	SF3B1	T	C	missense_variant	c.2098A>G	p.Lys700Glu	0.4512
83	5	1294975	TERT	G	A	missense_variant	c.130C>T	p.Pro44Ser	0.5505
83	5	1295228	TERT	G	A	upstream_gene_variant	c.-124C>T		0.272
83	17	7577539	TP53	GG	AA	missense_variant	c.741_742delCCinsTT	p.Arg248Trp	1.0

## Sheet: Copy number alterations
sampleId	Chromosome	Chromosome band	Gene	Copies
3	X	p21.2-p21.3	IL1RAPL1	0
4	2	q22.1-q22.2	LRP1B	0
4	3	p22.1	CTNNB1	0
4	9	p21.3	CDKN2A	0
4	17	21.31	BRCA1	0
4	18	q11.2	ZNF521	0
4	22	q12.1	CHEK2	0
4	X	p21.1-p21.2	DMD	0
7	4	q12	KDR	25
7	4	q12	KIT	25
7	4	q12	PDGFRA	38
11	9	p21.3	CDKN2A	0
12	6	q26	PARK2	0
12	12	q14.1	CDK4	55
12	12	q15	MDM2	41
12	17	q11.2	NF1	0
13	12	q14.1	CDK4	114
13	12	q15	MDM2	104
13	1	q21.3	MCL1	11
13	13	q34	IRS2	25
13	20	q13.2	ZNF217	7
13	1	q21.2	HIST2H3D	10
14	12	q14.1	CDK4	103
14	12	q15	MDM2	231
14	12	q15	MYC	23
14	19	q12	CCNE1	23
15	12	q14.1	CDK4	45
15	12	q15	MDM2	75
15	6	q22.1	ROS1	22
15	18	q21.1	SMAD2	0
15	19	p13.11	JAK3	10
15	19	p13.12	PRKACA	12
16	12	q14.1	CDK4	57
16	12	q15	MDM2	80
16	6	p21.1	VEGFA	12
16	6	p21.2	PIM1	8
17	12	q14.1	CDK4	86
17	12	q15	MDM2	121
17	6	q21	AIM1	22
17	6	q22.1	ROS1	7
17	X	q21.1	ATRX	0
18	6	q25.1	ESR1	16
18	8	q24.11	RAD21	18
18	12	q14.1	CDK4	54
18	12	q15	MDM2	79
19	9	p21.3	CDKN2A	0
19	9	p23-p24.1	PTPRD	0
19	12	q14.1	CDK4	12
19	12	q15	MDM2	30
20	5	p15.33	TERT	11
20	6	p21.2	PIM1	9
20	12	q14.1	CDK4	35
20	12	q15	MDM2	126
20	X	p11.3	KDM6A	0
21	12	q14.1	CDK4	20
21	12	q15	MDM2	15
23	10	q23.31	PTEN	0
25	13	q14.2	RB1	0
26	13	q14.2	RB1	0
26	17	p13.1	TP53	0
26	11	q14.1	RSF1	10
27	13	q14.2	RB1	0
27	17	p13.1	TP53	0
27	16	q22.1	CBFB	0
28	13	q14.2	RB1	0
29	13	q14.2	RB1	0
30	13	q14.2	RB1	0
30	17	p13.1	TP53	0
32	13	q14.2	RB1	0
32	17	p13.1	TP53	0
32	10	q23.31	PTEN	0
33	13	q14.2	RB1	0
33	17	p13.1	TP53	0
33	10	q23.31	PTEN	0
34	13	q14.2	RB1	0
34	8	p23.2	CSMD1	0
35	13	q14.2	RB1	0
35	22	q12.2	NF2	0
37	13	q14.2	RB1	0
37	17	p13.1	TP53	0
37	8	p23.2	CSMD1	0
39	13	q14.2	RB1	0
39	17	p13.1	TP53	0
40	13	q14.2	RB1	0
41	13	q14.2	RB1	0
41	17	p13.1	TP53	0
45	12	q15	MDM2	98
45	1	q21.3	MCL1	31
46	9	p21.3	CDKN2A	0
47	22	q12.2-q12.3	DEPDC5	0
47	9	p21.3	CDKN2A	0
47	9	p21.2	CDKN1A	0
47	17	q24.1	AXIN2	0
48	9	p21.3	CDKN2A	0
48	X	p21.1-p21.2	DMD	0
48	17	q11.2	NF1	0
48	8	q13.2	PREX2	6
48	8	p21.13	ZBTB10	5
48	8	q24.22	TG	6
49	11	p13	CD44	93
50	X	p11.3	KDM6A	0
50	X	p21.1-p21.2	DMD	0
51	9	p21.3	CDKN2A	0
51	22	q12.2-q12.3	DEPDC5	0
55	13	q14.2	RB1	0
56	3	p21.1	BAP1	0
56	3	p21.1	PBRM1	0
58	9	p21.3	CDKN2A	0
59	1	p12	ADAM30	198
59	4	q12	KIT	40
59	4	q12	PDGFRA	40
59	5	p15.33	TERT	85
59	12	q13.2	ERBB3	22
59	12	q14.1	CDK4	25
59	12	q15	MDM2	25
59	17	p13.2	SMTNL2	37
61	13	q14.2	RB1	0
61	17	p13.1	TP53	0
62	13	q14.2	RB1	0
62	X	q21.1	ATRX	0
63	18	q11.2	ZNF521	0
63	17	q11.2	NF1	0
64	9	p21.3	CDKN2A	0
65	2	q32.1	ITGAV	0
65	2	q34	ERBB4	0
66	13	q14.2	RB1	0
66	17	p13.1	TP53	0
67	17	p13.1	TP53	0
68	4	q12	KDR	16
68	4	q12	KIT	16
68	4	q12	PDGFRA	16
68	2	q34	ERBB4	0
69	13	q14.2	RB1	0
69	9	p13.2	PAX5	8
70	16	p13.3	TSC2	0
71	4	q12	KDR	21
71	4	q12	KIT	42
71	4	q12	PDGFRA	42
71	9	p21.3	CDKN2A	0
71	6	q13	EEF1A1	15
72	9	p21.3	CDKN2A	0
72	8	p23.2	CSMD1	0
73	9	p21.3	CDKN2A	0
73	17	q11.2	NF1	0
75	13	q14.2	RB1	0
75	17	p13.1	TP53	0
75	13	q14.2	RB1	0
75	22	q11.21	DGCR8	11
75	17	p13.1	TP53	0
76	17	p13.1	TP53	0
76	19	p13.12	PRKACA	12
76	19	p13.2	CALR	11
76	19	p13.3	MAP2K2	11
77	5	p15.33	TERT	10

## Sheet: Structural variants
sampleId	Gene_1	Gene_2	Exon_1	Exon_2	Copies
7	MYL7	NRG1	4	2	1.9
8	SS18	SSX1
9	SS18	SSX1	10	6	1.1
10	SS18	SSX1	10	6	1.2
11	EWSR1	ATF1	8	5	1.0
18	ESR1	SEMA6B	1	2	3.4
22	FUS	DDIT3	5	2
23	FUS	DDIT3	5	Promoter region	0.7
24	FUS	DDIT3	5	2	2.0
42	MEAF6	PHF1	5	2	1.9
46	FUS	TFCP2	6	2	2.3
46	ALK	ALK	1	18	2.2
57	EWSR1	POU5F1	2	2	1.0
58	WWTR1	CAMTA1	4	8
78	NAB2	STAT6	6	16	2.1
80	EWSR1	WT1	8	8	2.3

## Sheet: Signatures
sampleId	Signature	Score	Details
4	Homologous repair deficiency	0.74
21	Homologous repair deficiency	0.8
49	High mutational load	161	Tumor mutational burden (7,6mt/MB)
81	High mutational load	3625	Tumor mutational burden (303.7mt/MB)
82	High mutational load	298	Tumor mutational burden (19,9mt/MB)
83	High mutational load	1546	Tumor mutational burden (93.2mt/MB)
