# Supplementary material for: Clinical Impact of Prospective Whole Genome Sequencing in Sarcoma Patients
Source: Cancers (Basel). 2022 Jan 16;14(2):436. doi: 10.3390/cancers14020436 (PMC8773512; doi:10.3390/cancers14020436)
Supplement: Supplementary file 1 [file cancers-14-00436-s001.zip › Supplementary tables.xlsx]

## Sheet: 49 gene panel
																	Gene
																	APC	CDH1	HPRT2	MSH6	POLD1	RET	SMARCB1
																	ATM	CDK4	KIT	MUTYH*	POLE	SDHA	STK11
																	BAP1	CDKN2A	MEN1	NF1	PTCH1	SDHAF2	TP53
																	BMPR1A	CHEK2	MET	NF2	PTEN	SDHB	TSC1
																	BRCA1	EPCAM	MITFE318K	NTHL1*	RAD51C	SDHC	TSC2
																	BRCA2	FH	MLH1	PALB2	RAD51D	SDHD	VHL
																	BRIP1	FLCN	MSH2	PMS2	RB1	SMAD4	WT1
																	* For genes with an asterix, only biallelic germline variants are considered pathogenic.
																	For MITF, only the Glu318Lys variant is regarded as pathogenic

## Sheet: KIT deletions
Gene	Chromosome	Position	Exon	Ref	Alt	Length of INDEL	Samples (n)
KIT	4	55593069	11	GTTGTTGAGGAGATAAATGGAAACAATTATGTTTACATAGACCCAACACAAC	G	51	2
KIT	4	55593599	11	ACAGTGGAAGGTTGTTGAGGAGATAAATGGAAACAATTATGTTTACATAGAC	A	51	1
KIT	4	55593601	11	AGTGGAAGGTTGTTGAGGAGATAAATGGAAACAATTATGTTTACATAG	A	47	1
KIT	4	55593581	11	GAAACCCATGTATGAAGTACAGTGGAAG	G	27	1
KIT	4	55593593	11	TGAAGTACAGTGGAAGGTTGTTGAG	T	24	1
KIT	4	55593608	11	GGTTGTTGAGGAGATAAATGGA	G	21	1
KIT	4	55593589	11	TGTATGAAGTACAGTGGAA	T	18	1
KIT	4	55593586	11	CCATGTATGAAGTACAGTG	C	18	1
KIT	4	55593604	11	GGAGGTTGTTGAGGA	G	15	1
KIT	4	55593600	11	CAGTGGAAGGTTGTTG	C	15	1
KIT	4	55593596	11	AGTACAGTGGAAGGTT	A	15	4
KIT	4	55593593	11	TGAAGTACAGTGGAAG	T	15	1
KIT	4	55593583	11	AACCCATGTATGAAGT	A	15	1
KIT	4	55593593	11	TGAAGTACAGTGG	T	12	1
KIT	4	55593604	11	GGAGGTTGT	G	9	1
KIT	4	55593603	11	TGGAGGTTG	T	9	1
KIT	4	55593605	11	GAAGGTT	G	6	1
KIT	4	55593600	11	CAGTGGA	C	6	5
KIT	4	55593598	11	TACAGTG	T	6	1
KIT	4	55592178	11	C	CTGCCTA	6	7

## Sheet: Tissue retrieval procedures
Study number	1.	1. Date	2.	2. Date	3.	3. Date	4.	4. Date	5.	5. Date	6.	6. Date	7.	7. Date
1	Histological biopsy	2019-11-01	Histological biopsy	2019-11-01	Resection	2019-12-01
2	Histological biopsy	2018-08-01	Histological biopsy	2018-10-01	Resection	2018-11-01	Cytological punction	2019-08-01	Histological biopsy	2019-09-01	Histological biopsy	2019-09-01	Resection	2019-09-01
3	Histological biopsy	2020-09-01	Histological biopsy	2020-09-01	Histological biopsy	2020-10-01	Histological biopsy	2020-10-01		-
4	Cytological punction	2017-10-01	Histological biopsy	2017-10-01	Resection	2017-10-01	Histological biopsy	2018-03-01	Resection	2018-04-01
5	Histological biopsy	2016-06-01	Resection	2016-08-01	Resection	2019-07-01		-		-
6	Histological biopsy	2018-08-01	Resection	2018-09-01	Resection	2018-10-01	Resection	2018-11-01	Cytological punction	2019-09-01	Resection	2019-09-01
7	Histological biopsy	2019-07-01	Histological biopsy	2019-08-01		-		-		-
8	Cytological punction	2019-11-01	Histological biopsy	2019-12-01	Cytological punction	2019-12-01	Cytological punction	2019-12-01	Cytological punction	2019-12-01	Resection	2019-12-01	Histological biopsy	2019-12-01
9	Histological biopsy	2017-11-01	Resection	2018-04-01	Histological biopsy	2020-04-01		-		-
10	Histological biopsy	2020-03-01		-		-		-		-
11	Histological biopsy	2020-02-01	Resection	2020-04-01		-		-		-
12	Cytological punction	2014-03-01	Histological biopsy	2014-03-01	Resection	2014-07-01	Histological biopsy	2018-09-01	Resection	2019-11-01
13	Histological biopsy	2019-06-01	Resection	2019-08-01	Histological biopsy	2019-12-01		-		-
14	Histological biopsy	2014-07-01	Cytological punction	2014-08-01	Resection	2014-08-01	Histological biopsy	2017-04-01	Histological biopsy	2020-01-01
15	Cytological punction	2016-09-01	Histological biopsy	2016-09-01	Resection	2016-10-01		-		-
16	Resection	2015-09-01	Resection	2018-09-01	Histological biopsy	2020-04-01		-		-
17	Histological biopsy	2018-12-01	Histological biopsy	2019-01-01	Resection	2019-02-01		-		-
18	Histological biopsy	2019-01-01	Resection	2019-01-01	Resection	2019-12-01		-		-
19	Histological biopsy	2020-03-01		-		-		-		-
20	Histological biopsy	2020-05-01	Histological biopsy	2020-05-01	Histological biopsy	2020-06-01	Histological biopsy	2020-07-01		-
21	Resection	2012-10-01	Histological biopsy	2020-01-01		-		-		-
22	Cytological punction	2018-08-01	Histological biopsy	2018-08-01	Resection	2018-12-01		-		-
23	Histological biopsy	2016-03-01	Resection	2016-06-01	Histological biopsy	2020-06-01		-		-
24	Histological biopsy	2014-02-01	Histological biopsy	2014-02-01	Histological biopsy	2014-04-01	Resection	2017-10-01		-
25	NA			-		-		-		-
26	Resection	2014-11-01	Resection	2015-01-01	Cytological punction	2015-09-01	Resection	2015-09-01	Histological biopsy	2019-01-01
27	Resection	2020-01-01	Histological biopsy	2020-06-01		-		-		-
28	Histological biopsy	2019-09-01		-		-		-		-
29	Resection	2019-10-01	Histological biopsy	2020-06-01		-		-		-
30	Histological biopsy	2016-05-01	Histological biopsy	2016-07-01	Histological biopsy	2020-06-01		-		-
31	Resection	2017-07-01	Histological biopsy	2020-07-01		-		-		-
32	Resection	2016-01-01	Resection	2016-10-01	Resection	2017-10-01	Resection	2019-06-01		-
33	NA			-		-		-		-
34	Resection	2017-07-01	Histological biopsy	2020-07-01	Histological biopsy	2020-07-01	Histological biopsy	2020-07-01		-
35	NA			-		-		-		-
36	NA			-		-		-		-
37	Histological biopsy	2020-07-01	Resection	2020-09-01		-		-		-
38	Histological biopsy	2020-03-01	Resection	2020-09-01		-		-		-
39	Histological biopsy	2020-07-01	Resection	2020-11-01		-		-		-
40	Cytological punction	2020-08-01	Histological biopsy	2020-08-01	Cytological punction	2020-09-01		-		-
41	Histological biopsy	2020-10-01	Histological biopsy	2020-12-01		-		-		-
42	NA			-		-		-		-
43	Resection	2020-02-01	Histological biopsy	2020-03-01	Histological biopsy	2020-10-01		-		-
44	Cytological punction	2008-10-01	Cytological punction	2008-11-01	Resection	2008-11-01	Histological biopsy	2020-08-01		-
45	Histological biopsy	2019-12-01	Cytological punction	2020-08-01	Histological biopsy	2020-08-01	Histological biopsy	2020-10-01		-
46	Surgical excision	2013-07-01	Histological biopsy	2013-09-01	Histological biopsy	2013-10-01	Resection	2014-01-01	Histological biopsy	2020-03-01
47	Histological biopsy	2019-08-01	Histological biopsy	2019-10-01		-		-		-
48	Cytological punction	2018-12-01	Cytological punction	2019-01-01	Histological biopsy	2019-01-01	Cytological punction	2019-11-01	Cytological punction	2019-12-01	Resection	2020-01-01
49	Histological biopsy	2016-06-01	Histological biopsy	2016-09-01	Cytological punction	2016-09-01	Histological biopsy	2016-09-01	Resection	2019-05-01	Histological biopsy	2019-10-01
50	Cytological punction	2018-07-01	Histological biopsy	2018-07-01	Resection	2018-10-01		-		-
51	Cytological punction	2017-06-01	Histological biopsy	2017-06-01	Resection	2018-02-01	Histological biopsy	2019-03-01	Histological biopsy	2019-09-01
52	Cytological punction	2019-09-01	Histological biopsy	2019-09-01	Cytological punction	2019-09-01	Histological biopsy	2019-09-01	Resection	2019-10-01
53	Histological biopsy	2019-12-01	Resection	2019-12-01		-		-		-
54	Histological biopsy	2020-04-01	Histological biopsy	2020-04-01	Cytological punction	2020-04-01	Histological biopsy	2020-06-01	Histological biopsy	2020-07-01
55	NA			-		-		-		-
56	NA			-		-		-		-
57	Histological biopsy	2020-02-01	Histological biopsy	2020-04-01	Histological biopsy	2020-04-01	Resection	2020-06-01		-
58	Surgical excision	2015-10-01	Resection	2015-12-01	Resection	2016-01-01	Histological biopsy	2020-01-01		-
59	Resection	2019-10-01	Resection	2020-05-01	Histological biopsy	2020-07-01		-		-
60	Histological biopsy	2019-11-01	Histological biopsy	2020-01-01	Resection	2020-04-01	Resection	2020-06-01		-
61	NA			-		-		-		-
62	Histological biopsy	2016-01-01	Histological biopsy	2017-02-01	Resection	2017-06-01	Histological biopsy	2020-12-01		-
63	NA			-		-		-		-
64	Histological biopsy	2015-08-01	Resection	2015-12-01	Resection	2018-03-01	Histological biopsy	2019-05-01		-
65	Cytological punction	2016-08-01	Histological biopsy	2016-08-01	Resection	2016-08-01	Cytological punction	2018-08-01	Histological biopsy	2018-08-01	Histological biopsy	2019-06-01
66	Histological biopsy	2017-04-01	Resection	2017-08-01	Resection	2019-08-01		-		-
67	NA			-		-		-		-
68	Histological biopsy	2019-08-01	Histological biopsy	2019-09-01		-		-		-
69	Histological biopsy	2014-06-01	Resection	2014-09-01	Histological biopsy	2016-07-01	Resection	2016-08-01	Histological biopsy	2017-11-01	Resection	2018-09-01	Resection	2019-01-01
70	Cytological punction	2019-02-01	Histological biopsy	2019-02-01	Resection	2019-03-01		-		-
71	Cytological punction	2017-03-01	Histological biopsy	2017-04-01	Histological biopsy	2017-04-01	Histological biopsy	2017-05-01		-
72	NA			-		-		-		-
73	Cytological punction	2019-03-01	Histological biopsy	2019-03-01		-		-		-
74	Histological biopsy	2018-07-01	Resection	2018-09-01	Histological biopsy	2020-06-01		-		-
75	NA			-		-		-		-
76	Histological biopsy	2018-10-01	Histological biopsy	2018-11-01	Resection	2019-02-01	Resection	2020-07-01		-
77	Histological biopsy	2020-06-01		-		-		-		-
78	Histological biopsy	2015-04-01	Resection	2015-06-01	Histological biopsy	2020-06-01		-		-
79	Histological biopsy	2014-02-01	Histological biopsy	2014-03-01	Resection	2014-07-01	Histological biopsy	2020-07-01		-
80	Histological biopsy	2020-08-01	Histological biopsy	2020-08-01	Histological biopsy	2020-09-01		-		-
81	Resection	2019-07-01	Histological biopsy	2020-09-01		-		-		-
82	Histological biopsy	2020-04-01	Resection	2020-05-01		-		-		-
83	Histological biopsy	2019-07-01	Resection	2019-08-01	Resection	2019-12-01	Histological biopsy	2020-05-01	Histological biopsy	2020-08-01	Resection	2020-08-01
Italic: Exact date not available, but estimation based on patient file
Bold: procedure to derive tissue for WGS analysis
Underlined: procedures performed before definite diagnosis

## Sheet: Diagnostic modalities
#	Analyses performed - I	Analyses performed - II	Analyses performed - III	Analyses performed - IV	Analyses performed - V	Analyses performed - VI	Analyses performed - VII	Analyses performed - VIII	Analyses performed - IX	Analyses performed - X
1	1. H&E/IHC	2. H&E/IHC	3. H&E/IHC	3. (Rev) H&E/IHC, NGS, Archer
2	1. H&E/IHC	1. (Rev) H&E/IHC	2. H&E/IHC	3. H&E/IHC	4. H&E/IHC	5. H&E/IHC	6. H&E/IHC	7. H&E/IHC
3	1. H&E/IHC, NGS, Archer, FISH	2. H&E/IHC	3. H&E/IHC	4. H&E/IHC
4	1. H&E	2. H&E	3. H&E	2.3. (Rev) H&E	4. H&E	5. H&E	5. (Rev) H&E
5	1. H&E	1. (Rev) H&E	2. H&E	3. H&E
6	1. NA	2. NA	3. NA	4. NA	5. H&E	6. H&E, IHC
7	1. H&E	1. (Rev) H&E	2. H&E, IHC
8	1. H&E	1. (Rev) H&E	2. H&E	3. H&E	4. H&E	5. H&E, IHC	6. H&E, IHC, NGS, SISH	7. H&E	7. (Rev) H&E, IHC
9	1. H&E, IHC	1. (Rev) H&E, IHC, RT-PCR	2. H&E	3. H&E, IHC
10	1. H&E, IHC, DISH
11	1. H&E, IHC, Archer	2. H&E
12	1. H&E	2. H&E, IHC, FISH	3. H&E, IHC	4. H&E, IHC, NGS	5. H&E, IHC, DISH
13	1. H&E, IHC, FISH	2. H&E, IHC	3. H&E, IHC, NGS
14	1. H&E	1. (Rev) H&E	2. H&E	3. H&E	3. (Rev) H&E, IHC	4. H&E	5. H&E, DISH
15	1. H&E	2. H&E, IHC	3. H&E
16	1. NA	1. (Rev) H&E, IHC, FISH	2. H&E	3. H&E, DISH
17	1. NA	2. H&E, IHC	3. H&E
18	1. H&E, IHC, DISH	2. H&E	3. H&E
19	1. H&E, IHC, DISH
20	1. H&E, FISH	1. (Rev) H&E	2. NA	2. (Rev) H&E	3. H&E, IHC	4. H&E, IHC
21	1. NA	2. H&E, IHC, DISH
22	1. H&E	2. H&E, IHC, RT-PCR	3. H&E
23	1. H&E, RT-PCR	2. H&E	3. H&E
24	1. H&E	1. (Rev) H&E	2. H&E	3. H&E, IHC, RT-PCR, qPCR	4. H&E, RT-PCR
25
26	1.H&E, IHC	1. (Rev) H&E	2. H&E, IHC	3. Morpology	4. H&E, IHC, NGS	5. H&E
27	1. H&E, IHC	1. (Rev) H&E, IHC	2. H&E, IHC, NGS
28	1. H&E, IHC
29	1. H&E, IHC	1. (Rev) H&E, IHC, ISH	1. (Rev) H&E, IHC, Archer	2. H&E, IHC
30	1. H&E, IHC	2. H&E, IHC
31	1. H&E, IHC	1. (Rev) H&E, IHC	1. (Rev) H&E, IHC	2. H&E, IHC
32	1. H&E, IHC	1. (Rev)	1. (Rev)	1. (Rev) H&E, IHC	2. H&E	3. H&E	4. H&E
33
34	1. NA	2. H&E, IHC	3. H&E	4. H&E
35
36
37	1. H&E, IHC	1. (Rev) H&E, IHC, DISH	2. H&E, IHC
38	1. H&E, IHC	1. (Rev) H&E, IHC, FISH	1. (Rev) H&E, IHC	2. H&E, NGS
39	1. H&E, IHC	2. H&E
40	1. H&E	2. H&E, IHC, DISH	3. H&E
41	1. H&E, IHC	1. (Rev) H&E, IHC	2. H&E
42
43	1. H&E, IHC	1. (Rev) H&E, IHC	2. H&E	2. (Rev) H&E	3. H&E, IHC, Archer
44	1. H&E	2. H&E	3. H&E, IHC, RT-PCR	3. (Rev) H&E, ICH	4. H&E, IHC, Archer
45	1. H&E, IHC, FISH, methylation	1. (Rev) H&E	2. H&E	3. H&E	4. H&E, IHC, Archer
46	1. H&E	1. (Rev) H&E	1. (Rev) H&E, IHC	1. (Rev) H&E, IHC	2. H&E, IHC	2. (Rev) H&E, IHC	3. H&E, IHC	4. H&E	4. (Rev) H&E, IHC	5. H&E, IHC, Archer (after WGS)
47	1. H&E, IHC	1. (Rev) H&E, IHC	1. (Rev) H&E, IHC	2. H&E, IHC, Archer
48	1. H&E	2. H&E	3. H&E, IHC, DISH	3. (Rev) H&E, IHC, Archer	4. H&E	5. H&E	6. H&E
49	1. H&E	2. H&E, IHC	3. H&E	4. H&E, IHC	4. (Rev) H&E, IHC	4. (Rev) NGS	5. H&E	6. H&E, IHC
50	1. H&E	2. H&E, IHC, Sanger seq, NGS	3. H&E, Sanger seq, Archer
51	1. H&E	2. H&E, NGS, Sanger seq	3. H&E, NGS, Sanger seq	4. H&E, IHC, NGS	5. H&E, IHC, NGS
52	1. H&E	2. H&E, IHC	3. H&E	4. H&E, IHC, NGS	5. H&E
53	1. H&E, IHC	1. (Rev) H&E, IHC	2. H&E, IHC, NGS
54	1. H&E	2. H&E	3. H&E	3. (Rev) H&E	4. H&E, IHC, NGS	5. H&E, IHC, NGS, Archer
55
56
57	1. H&E, IHC	1. (Rev) H&E, IHC, FISH	1. (Rev) H&E, IHC	2. H&E	3. H&E, IHC, RT-PCR, Archer
58	1. H&E, IHC	2. H&E, IHC	2. (Rev) H&E, IHC	3. NA	3. (Rev) H&E, IHC	3. (Rev) H&E, IHC, Archer	4. H&E
59	1. H&E, IHC	1. (Rev) H&E, IHC, FISH	2. H&E, IHC, DISH	2. (Rev) H&E, IHC, DISH
60	1. H&E, IHC	1. (Rev) H&E, IHC	2. H&E, IHC, NGS, Archer	2. (Rev) H&E, IHC	3. H&E	4. H&E
61
62	1. H&E, IHC	1. (Rev) H&E, IHC	2. H&E, IHC	3. H&E	4. H&E, IHC
63
64	1. H&E, IHC	1. (Rev) H&E, IHC	2. H&E	3. H&E	4. H&E
65	1. H&E	2. H&E, IHC	3. H&E, IHC	4. H&E	5. H&E	6. H&E
66	1. H&E, IHC	1. (Rev) H&E, IHC	1. (Rev) H&E, IHC	2. H&E	3. H&E, Archer
67
68	1. H&E, IHC	1. (Rev) H&E, IHC	2. H&E, IHC, DISH
69	1. H&E, IHC	1. (Rev) H&E, IHC	2. H&E	3. H&E	4. H&E	4. (Rev) NGS	5. H&E	6. H&E	7. H&E	8. H&E
70	1. H&E	2. H&E, IHC	3. H&E, IHC	3. (Rev) FISH, QT-PCR, NGS
71	1. H&E	2. H&E	3. H&E, IHC	4. H&E, IHC, Sanger seq
72
73	1. H&E	2. H&E, IHC, RT-PCR (SSX)
74	1. H&E, IHC	1. (Rev) H&E, IHC	2. H&E, IHC	3. H&E, IHC
75
76	1. H&E, IHC	2. H&E, IHC	3. H&E	4. H&E
77	1. H&E, IHC, DISH, NGS
78	1. H&E, IHC	1. (Rev) H&E, IHC	1. (Rev) H&E, IHC	2. H&E, IHC, RT-PCR (SSX)	3. H&E, IHC, NGS
79	1. H&E, IHC	1. (Rev) H&E, IHC	2. H&E, IHC	3. H&E, IHC	3. (Rev) IHC	4. H&E, IHC
80	1. H&E	2. H&E, IHC	2. (Rev) H&E, IHC	3. H&E, IHC, Archer (after WGS)
81	1. H&E, IHC	1. (Rev) H&E, IHC	1. (Rev) H&E, IHC, Archer	2. H&E, IHC
82	1. H&E, IHC, Archer, NGS	2. H&E, IHC
83	1. H&E	2. H&E, IHC	2. (Rev) H&E, IHC, NGS, FISH	2. (Rev) H&E, IHC	2. (Rev) H&E,	3. H&E, IHC, NGS	4. H&E, IHC	5. H&E	6. H&E

## Sheet: MolDx in revision cases
#	Molecular diagnostics performed	Gene panel
8	NGS/AmpliSeq - Illumina Ampliseq™ Cancer Hotspot Panel	ABL1, AKT1, ALK, APC, ATM, BRAF, CDH1, CDKN2A, CSF1R, CTNNB1, EGFR, ERBB2, ERBB4, EZH2, FBXW7, FGFR1, FGFR2, FGFR3, FLT3, GNA11, GNAQ, GNAS, HNF1A, HRAS, IDH1, IDH2, JAK2, JAK3, KDR, KIT, KRAS, MET, MLH1, MPL, NOTCH1, NPM1, NRAS, PDGFRA, PIK3CA, POLE, PTEN, PTPN11, RB1, RET, ROS1, SMAD4, SMARCB1, SMO, SRC, STK11, TP53, VHL
8	SISH	HER2
44	NGS RNA Archer/Miseq analysis	ALK, CAMTA1, CCNB3, CIC, EPC1, EWSR1, FOXO1, FUS, GLI1, HMGA2, JAZF1, MEAF6, MKL2, NCOA2, NTRK3, PDGFB, PLAG1, ROS1, SS18, STAT6, TAF15, TCF12, TFE3, TFG, USP6, YWHAE
44	RT-PCR	EWS
45	Sarcoma methylation classifier results	Not available
45	NGS RNA Archer/Miseq analysis	ALK, BRAF, EGFR, FGFR1, FGFR2, FGFR3, MET, NRG1, NTRK1, NTRK2, NTRK3, RET, ROS1
46	-
47	NGS RNA Archer/Miseq analysis	ALK, CAMTA1, CCNB3, CIC, EPC1, EWSR1, FOXO1, FUS, GLI1, HMGA2, JAZF1, MEAF6, MKL2, NCOA2, NTRK3, PDGFB, PLAG1, ROS1, SS18, STAT6, TAF15, TCF12, TFE3, TFG, USP6, YWHAE
54	NGS RNA Archer/Miseq analysis	ALK, CAMTA1, CCNB3, CIC, EPC1, EWSR1, FOXO1, FUS, GLI1, HMGA2, JAZF1, MEAF6, MKL2, NCOA2, NTRK3, PDGFB, PLAG1, ROS1, SS18, STAT6, TAF15, TCF12, TFE3, TFG, USP6, YWHAE
54	NGS/AmpliSeq - Illumina Ampliseq™ Cancer Hotspot Panel	ABL1, AKT1, ALK, APC, ATM, BRAF, CDH1, CDKN2A, CSF1R, CTNNB1, EGFR, ERBB2, ERBB4, EZH2, FBXW7, FGFR1, FGFR2, FGFR3, FLT3, GNA11, GNAQ, GNAS, HNF1A, HRAS, IDH1, IDH2, JAK2, JAK3, KDR, KIT, KRAS, MET, MLH1, MPL, NOTCH1, NPM1, NRAS, PDGFRA, PIK3CA, POLE, PTEN, PTPN11, RB1, RET, ROS1, SMAD4, SMARCB1, SMO, SRC, STK11, TP53, VHL
54	NGS/AmpliSeq - Illumina Ampliseq™ Cancer Hotspot Panel	ABL1, AKT1, ALK, APC, ATM, BRAF, CDH1, CDKN2A, CSF1R, CTNNB1, EGFR, ERBB2, ERBB4, EZH2, FBXW7, FGFR1, FGFR2, FGFR3, FLT3, GNA11, GNAQ, GNAS, HNF1A, HRAS, IDH1, IDH2, JAK2, JAK3, KDR, KIT, KRAS, MET, MLH1, MPL, NOTCH1, NPM1, NRAS, PDGFRA, PIK3CA, POLE, PTEN, PTPN11, RB1, RET, ROS1, SMAD4, SMARCB1, SMO, SRC, STK11, TP53, VHL
57	NGS RNA Archer/Miseq analysis	ALK, CAMTA1, CCNB3, CIC, EPC1, EWSR1, FOXO1, FUS, GLI1, HMGA2, JAZF1, MEAF6, MKL2, NCOA2, NTRK3, PDGFB, PLAG1, ROS1, SS18, STAT6, TAF15, TCF12, TFE3, TFG, USP6, YWHAE
57	RT-PCR	EWS1
57	FISH	EWS1, FUS
57	FISH	FKHR
63	-
80	-
81	NGS RNA Archer/Miseq analysis	ALK, CAMTA1, CCNB3, CIC, EPC1, EWSR1, FOXO1, FUS, GLI1, HMGA2, JAZF1, MEAF6, MKL2, NCOA2, NTRK3, PDGFB, PLAG1, ROS1, SS18, STAT6, TAF15, TCF12, TFE3, TFG, USP6, YWHAE
82	NGS RNA Archer/Miseq analysis	ALK, CAMTA1, CCNB3, CIC, EPC1, EWSR1, FOXO1, FUS, GLI1, HMGA2, JAZF1, MEAF6, MKL2, NCOA2, NTRK3, PDGFB, PLAG1, ROS1, SS18, STAT6, TAF15, TCF12, TFE3, TFG, USP6, YWHAE
82	NGS/AmpliSeq - Illumina Ampliseq™ Cancer Hotspot Panel	ABL1, AKT1, ALK, APC, ATM, BRAF, CDH1, CDKN2A, CSF1R, CTNNB1, EGFR, ERBB2, ERBB4, EZH2, FBXW7, FGFR1, FGFR2, FGFR3, FLT3, GNA11, GNAQ, GNAS, HNF1A, HRAS, IDH1, IDH2, JAK2, JAK3, KDR, KIT, KRAS, MET, MLH1, MPL, NOTCH1, NPM1, NRAS, PDGFRA, PIK3CA, POLE, PTEN, PTPN11, RB1, RET, ROS1, SMAD4, SMARCB1, SMO, SRC, STK11, TP53, VHL
83	NGS/AmpliSeq - Illumina Ampliseq™ Cancer Hotspot Panel	ABL1, AKT1, ALK, APC, ATM, BRAF, CDH1, CDKN2A, CSF1R, CTNNB1, EGFR, ERBB2, ERBB4, EZH2, FBXW7, FGFR1, FGFR2, FGFR3, FLT3, GNA11, GNAQ, GNAS, HNF1A, HRAS, IDH1, IDH2, JAK2, JAK3, KDR, KIT, KRAS, MET, MLH1, MPL, NOTCH1, NPM1, NRAS, PDGFRA, PIK3CA, POLE, PTEN, PTPN11, RB1, RET, ROS1, SMAD4, SMARCB1, SMO, SRC, STK11, TP53, VHL
83	NGS/AmpliSeq - Illumina Ampliseq™ Cancer Hotspot Panel	Not available
83	FISH	BCL-2, BCL-6, MYC
